# Supplementary material for: Genetic variation in the farnesoid X-receptor predicts Crohn’s disease severity in female patients
Source: PubMed Central journal article supplement (PMC7366697; doi:10.1038/s41598-020-68686-9), 2020-07-16

Supplementary Material

**Genetic variation in the Farnesoid X-Receptor Predicts Crohn's Disease Severity in Female Patients.**

Aze Wilson, Qian Wang, Ahmed A. Almousa, Laura E. Jansen, Yun-hee Choi, Ute I. Schwarz, Richard B. Kim

**Supplementary Table 1 - 6**

**Supplementary Figures 1 - 4**

## SUPPLEMENTARY TABLES:

**Supplementary Table 1. Primers for RT-PCR Analysis**

| <b>Primer Sets</b>          | <b>Forward Primer Sequence (5' to 3')</b> | <b>Reverse Primer Sequence (5' to 3')</b> |
|-----------------------------|-------------------------------------------|-------------------------------------------|
| ER $\alpha$ ( <i>ESR1</i> ) | ATGGAATCTGCCAAGAAGACT                     | GCGCTTGTGTTTCAACATTCT                     |
| ER $\beta$ ( <i>ESR2</i> )  | CGATGCTTTGGTTTGGGTGAT                     | GCCCTCTTTGCTTTTACTGTC                     |
| p53 ( <i>TP53</i> )         | CAGACTGCCTTCCGGGTCAGTCC                   | TCAGTCTGAGTCAGGCCCTTCTGTC                 |

Estrogen receptor, ER; real-time polymerase chain reaction, RT-PCR

**Supplementary Table 2. Demographic Characteristics of Patients with UC**

| <b>Variables</b>                                                 | <b>UC cohort<br/>(n =201)</b> |
|------------------------------------------------------------------|-------------------------------|
| <b>Age, years (mean, range)</b>                                  | 40.92 (18-91)                 |
| <b>Female sex (%)</b>                                            | 101(50.2)                     |
| <b>Weight, kg (mean <math>\pm</math> SD)</b>                     | 75.47 $\pm$ 15.63             |
| <b>Disease location</b>                                          |                               |
| <b>Pan-colitis</b>                                               | 121(60.2)                     |
| <b>Left-sided colitis</b>                                        | 70 (34.8)                     |
| <b>Proctitis</b>                                                 | 5 (2.5)                       |
| <b>Median disease duration, years<br/>(interquartile range)</b>  | 3.50 (2.00-10.67)             |
| <b>Smoking history (%)</b>                                       | 23 (11.4)                     |
| <b>Biologic exposure (%)</b>                                     | 117 (57.9)                    |
| <b>Anti-TNF (%)</b>                                              | 60 (29.7)                     |
| <b>Anti-integrin (%)</b>                                         | 19 (9.4)                      |
| <b>Anti-IL12/23 (%)</b>                                          | 0 (0)                         |
| <b>Combination therapy (%)</b>                                   | 31(15.3)                      |
| <b>Glucorticoid exposure (%)</b>                                 | 156 (77.2)                    |
| <b>Immunomodulator exposure</b>                                  |                               |
| <b>MTX (%)</b>                                                   | 15 (7.4)                      |
| <b>Thiopurine (%)</b>                                            | 132 (57.9)                    |
| <b>5-Aminosalicylate exposure (%)</b>                            | 149 (73.8)                    |
| <b>Number of drugs failed (mean <math>\pm</math><br/>SD)</b>     | 1.35 $\pm$ 1.34               |
| <b>Number of biologics failed<br/>(mean <math>\pm</math> SD)</b> | 0.30 $\pm$ 0.72               |
| <b>Surgery (%)</b>                                               | 18 (8.9)                      |
| <b>Mean number of surgeries<br/>(mean <math>\pm</math> SD)</b>   | 0.12 $\pm$ 0.40               |
| <b>Hospitalizations (mean <math>\pm</math> SD)</b>               | 0.65 $\pm$ 0.91               |
| <b>FXR -1GT carrier status (%)</b>                               | 12 (5.9)                      |
| <b>FXR -1GG carrier status (%)</b>                               | 190 (94.1)                    |

Ulcerative colitis, UC; standard deviation, SD; tumor necrosis factor  $\alpha$ , TNF; interleukin, IL; methotrexate, MTX; farnesoid X receptor, FXR

**Supplementary Table 3. Demographic Characteristics of CD Patients by *FXR -1G>T* Genotype and Surgical Status**

| Characteristics                                        | Surgical Intervention |                   | No Surgical Intervention |                   |
|--------------------------------------------------------|-----------------------|-------------------|--------------------------|-------------------|
|                                                        | FXR -1GG<br>n = 157   | FXR-1GT<br>n = 19 | FXR -1GG<br>n =354       | FXR-1GT<br>n = 12 |
| Age, years (mean, range)                               | 44.32 (18-85)         | 41.05(20-70)      | 40.50 (18-80)            | (18-60)           |
| Female sex (%)                                         | 73 (46.5)             | 16 (84.2)         | 229 (64.6)               | 3 (25.0)          |
| Weight, kg (mean ± SD)                                 | 76.49 ± 17.35         | 71.19 ± 18.49     | 77.31 ± 20.11            | 80.24 ± 16.70     |
| <b>Disease location</b>                                |                       |                   |                          |                   |
| Ileal                                                  | 49 (31.0)             | 3 (15.8)          | 145 (40.9)               | 4 (33.3)          |
| Colonic                                                | 21 (13.0)             | 2 (10.5)          | 76 (21.5)                | 2 (16.7)          |
| Ileo-colonic                                           | 87 (56.6)             | 14 (73.7)         | 133 (37.6)               | 6 (50.0)          |
| Median HBI (IQR)                                       | 6 (3-9)               | 6 (3-10)          | 5 (2-8)                  | 8 (4.5-10.5)      |
| Median disease duration, years (IQR)                   | 14.00 (6.23-25.00)    | 12.00(6.50-18.38) | 2.25 (1.13-7.75)         | 2.17 (1.31-5.50)  |
| Smoking history (%)                                    | 52 (31.1)             | 1 (5.3)           | 81 (22.9)                | 5 (41.7)          |
| Biologic exposure (%)                                  | 87 (56.1)             | 13 (68.4)         | 142 (40.1)               | 6 (50.0)          |
| Anti-TNF (%)                                           | 71 (55.4)             | 9 (47.4)          | 133 (37.6)               | 6 (50.0)          |
| Anti-integrin (%)                                      | 9 (5.7)               | 1 (5.3)           | 10 (2.8)                 | 0 (0)             |
| Anti-IL12/23 (%)                                       | 10 (6.4)              | 4 (21.1)          | 7 (2.0)                  | 0 (0)             |
| Pre-operative biologic exposure (%)                    | 37 (23.6)             | 8 (42.1)          | -                        | -                 |
| Combination therapy (%)                                | 57 (36.3)             | 6 (31.2)          | 45 (12.7)                | 2 (16.7)          |
| Glucocorticoid exposure (%)                            | 140(89.1)             | 18 (94.7)         | 276 (80.0)               | 9 (75.0)          |
| <b>Immunomodulator exposure</b>                        |                       |                   |                          |                   |
| MTX (%)                                                | 47 (29.9)             | 7 (36.8)          | 66 (18.6)                | 3 (25.0)          |
| Thiopurine (%)                                         | 98 (62.4)             | 13 (68.4)         | 194 (54.8)               | 5 (41.7)          |
| Number of drugs failed (mean ± SD)                     | 1.57 ± 1.54           | 1.68 ± 1.34       | 0.89 ± 1.11              | 0.90 ± 0.99       |
| Number of biologics failed (mean ± SD)                 | 0.71 ± 0.99           | 0.79 ± 1.13       | 0.15 ± 0.53              | 0.11 ± 0.33       |
| Number of surgeries (mean ± SD)                        | 1.71 ± 1.35           | 1.68 ± 0.95       | -                        | -                 |
| Time to first surgical intervention, years (mean ± SD) | 6.08 ± 7.16           | 2.69 ± 2.26       | -                        | -                 |
| Hospitalizations (mean ± SD)                           | 2.41 ± 2.82           | 2.21 ± 1.66       | 0.49 ± 1.41              | 0.08 ± 0.29       |

Farnesoid X receptor, FXR; kilograms, kg; standard deviation, SD; Harvey-Bradshaw Index, HBI; interquartile range, IQR; Crohn's disease, CD; tumor necrosis factor, TNF; interleukin, IL; methotrexate, MTX

**Supplementary Table 4. Multiple linear regression model for the effect on Ln-transformed FGF-19 plasma concentration for all subjects who underwent a surgery (n = 176, adjusted R<sup>2</sup>=0.069)**

| <b>Variable</b>               | <b>β-coefficients</b> | <b>Standard error</b> | <b>P-value</b>    |
|-------------------------------|-----------------------|-----------------------|-------------------|
| Intercept                     | -2.056                | 0.797                 | 0.11              |
| <b>FXR -1T carrier status</b> | -1.601                | 0.394                 | <b>&lt;0.0001</b> |
| Age                           | -0.005                | 0.008                 | 0.52              |
| Sex                           | 0.255                 | 0.252                 | 0.31              |
| Weight                        | 0.008                 | 0.007                 | 0.24              |
| Small bowel resection         | -0.277                | 0.337                 | 0.41              |
| Small bowel disease           | 0.362                 | 0.402                 | 0.37              |
| Disease activity              | -0.087                | 0.248                 | 0.73              |

**Supplementary Table 5. Multiple linear regression model for the effect on Ln-transformed FGF-19 plasma concentration for all female subjects who underwent a surgery (n = 321, adjusted R<sup>2</sup>=0.104)**

| <b>Variable</b>               | <b>β-coefficients</b> | <b>Standard error</b> | <b>P-value</b>    |
|-------------------------------|-----------------------|-----------------------|-------------------|
| Intercept                     | -2.284                | 1.181                 | 0.06              |
| <b>FXR -1T carrier status</b> | -1.897                | 0.515                 | <b>&lt;0.0001</b> |
| Age                           | -0.004                | 0.013                 | 0.76              |
| Weight                        | 0.006                 | 0.011                 | 0.59              |
| Small bowel resection         | -0.137                | 0.614                 | 0.82              |
| Small bowel disease           | 0.815                 | 0.702                 | 0.25              |
| Disease Activity              | 0.167                 | 0.399                 | 0.68              |

**Supplementary Table 6. Multiple linear regression model for the effect on Ln-transformed FGF-19 plasma concentration for all male subjects who underwent a surgery (n =221, adjusted R<sup>2</sup>=0.044)**

| <b>Variable</b>               | <b>β-coefficients</b> | <b>Standard error</b> | <b>P-value</b> |
|-------------------------------|-----------------------|-----------------------|----------------|
| Intercept                     | -0.805                | 0.968                 | 0.41           |
| <b>FXR -1T carrier status</b> | -0.150                | 0.690                 | 0.89           |
| Age                           | -0.008                | 0.009                 | 0.37           |
| Weight                        | 0.006                 | 0.008                 | 0.49           |
| Small bowel resection         | -0.527                | 0.346                 | 0.13           |
| Small bowel disease           | -0.328                | 0.420                 | 0.44           |
| Disease Activity              | -0.444                | 0.272                 | 0.11           |

## **SUPPLEMENTARY FIGURES:**

**Supplementary Figure 1** Participant flow diagram of the study. Inflammatory bowel disease, IBD; Crohn's disease, CD; ulcerative colitis, UC; number, n; farnesoid X receptor, FXR; multi-drug resistance-1, MDR1; pregnane X receptor, PXR; fibroblast growth factor-19, FGF19.

**Supplementary Figure 2** Time to first surgery following the diagnosis of UC (A) and risk of surgery (B) stratified by *FXR-1G>T* genotype expressed as wild type (GG) or variant (GT) in cohort of 201 subjects with UC. Farnesoid X receptor, FXR; ulcerative colitis, UC.

**Supplementary Figure 3** Genotype frequency for *MDR1 3435C>T* (Panel 1) and *PXR25385C>T* (Panel 2) separated by the presence or absence of an intra-abdominal surgical intervention related to the CD diagnosis for all subjects (A, D), female subjects (B, E), and male subjects (C, F). Genotypes are expressed as a percentage of the total population of study subjects undergoing surgery (n=176) or not undergoing surgery (n=366). Multi-drug resistance protein 1, MDR1; pregnane X receptor, PXR.

**Supplementary Figure 4** Time to first surgery following the diagnosis of CD stratified by *MDR1 3435C>T* (panel 1) and *PXR25385C>T* (panel 2) genotype expressed as wildtype (CC) or variant (CT or TT) for all subjects (A, D), female subjects (B, E), and male subjects (C, F). Multi-drug resistance protein 1, MDR1; pregnane X receptor, PXR; wild type (WT).

# Supplementary Figure 1

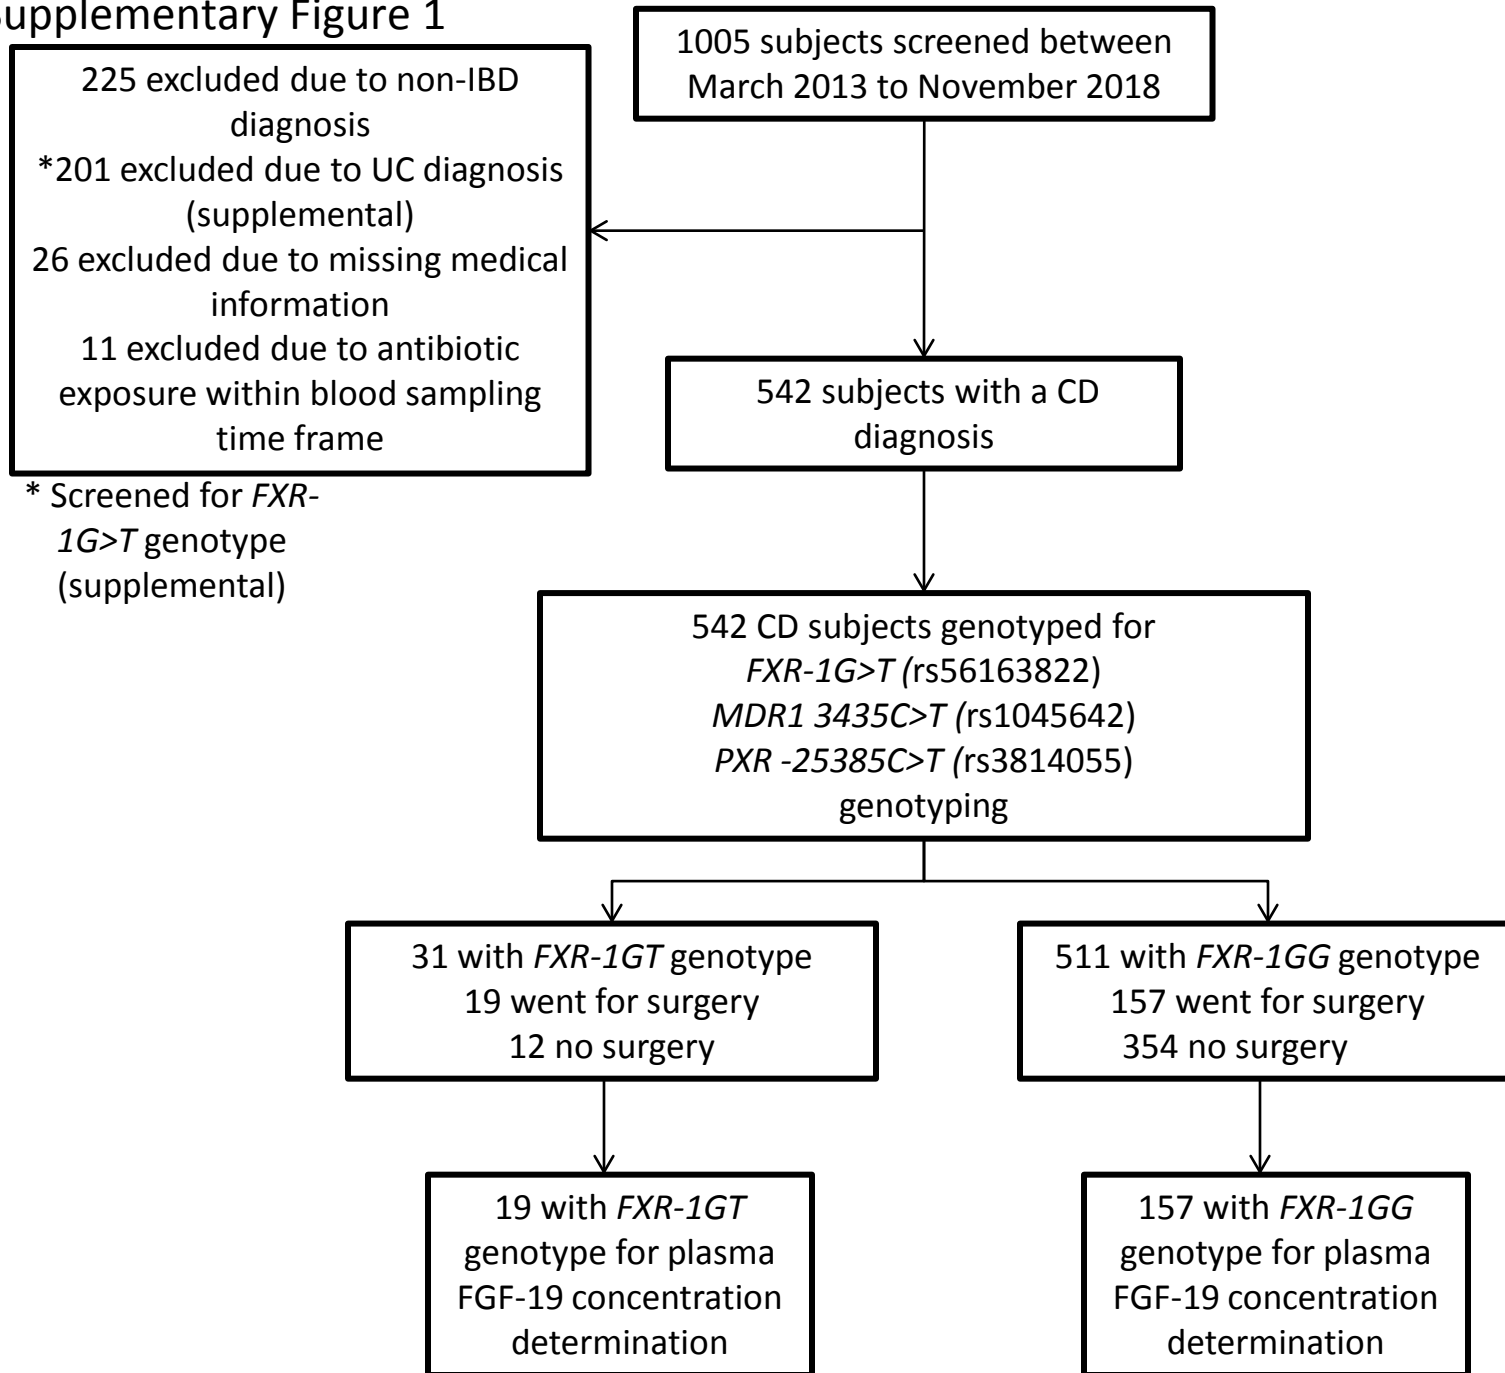

# Supplementary Figure 2

A

UC Cohort (n=202)

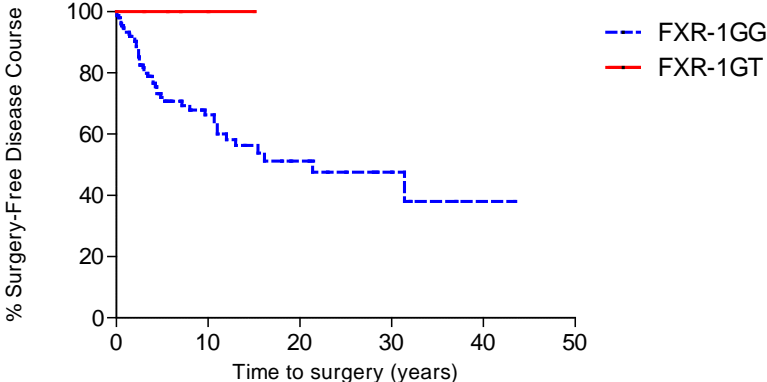

B

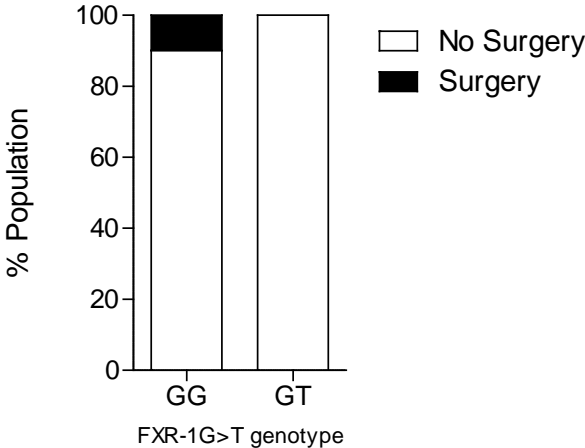



# Supplementary Figure 3

## 1. MDR1 3435C>T

**A**

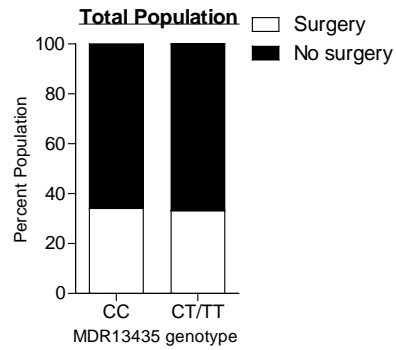

**B**

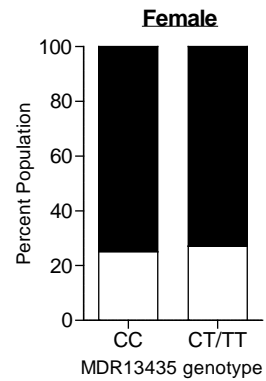

**C**

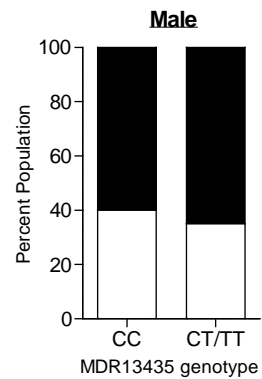

## 2. PXR 25385C>T

**D**

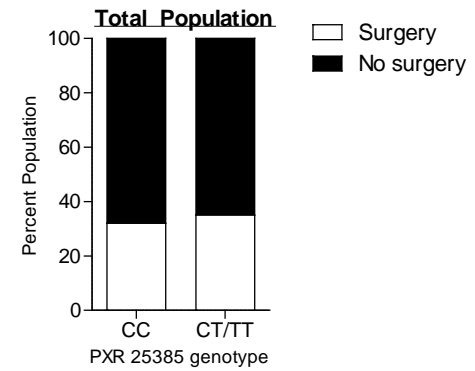

**E**

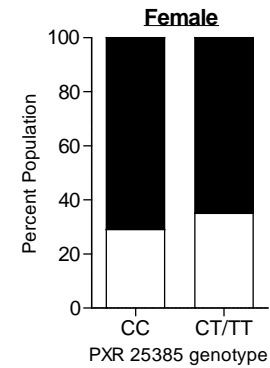

**F**

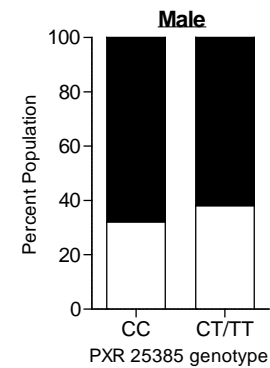

# Supplementary Figure 4

## 1. MDR1 3435C>T

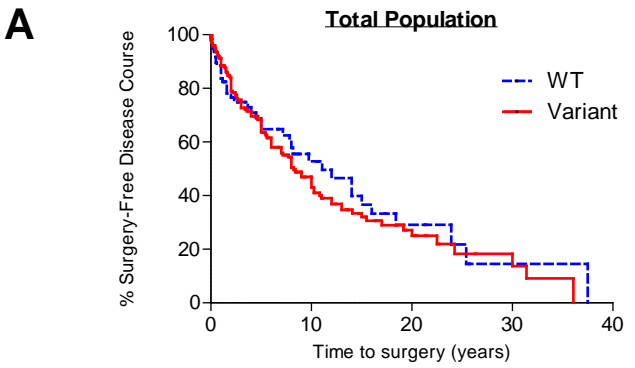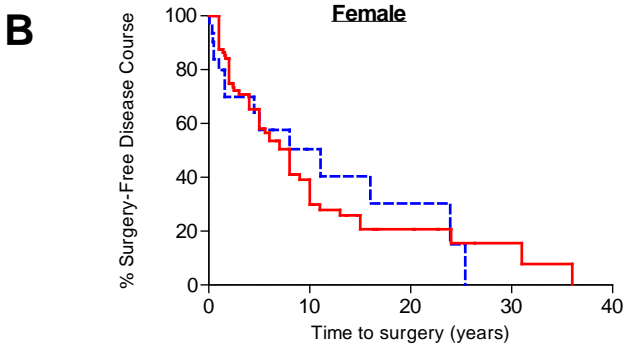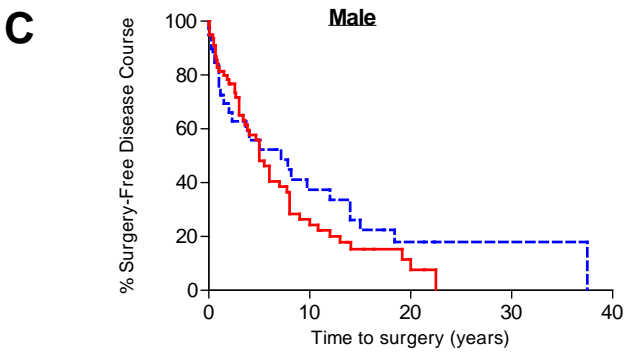

## 2. PXR 25385C>T

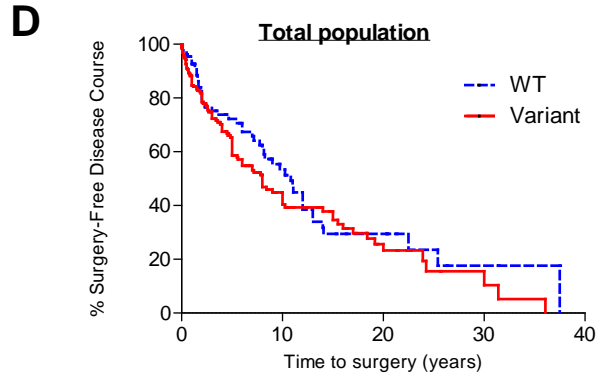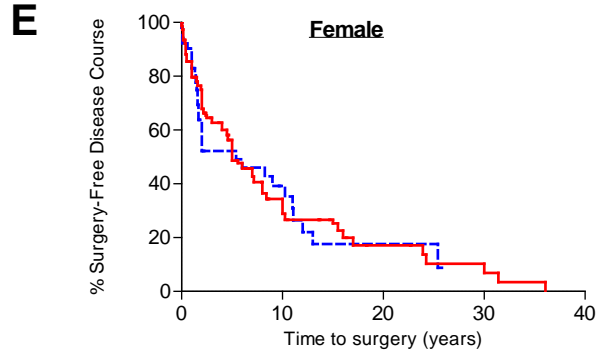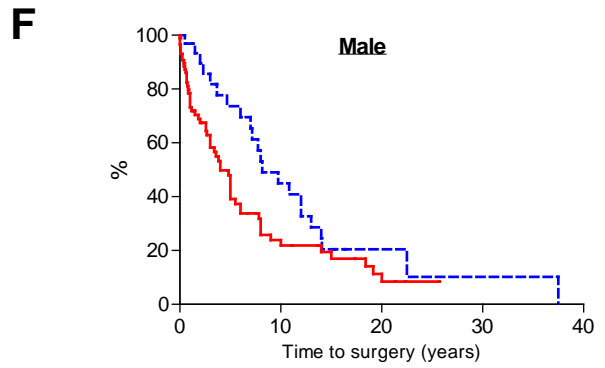

Supplement: 41598_2020_68686_MOESM1_ESM.pdf [file 41598_2020_68686_MOESM1_ESM.pdf]
